# Supplementary material for: Synthesis, structures and luminescent properties of cadmium(ii) metal organic frameworks based on 3-pyrid-4-ylbenzoic acid, 4-pyrid-4-ylbenzoic acid ligands
Source: Royal Society of Chemistry journal article supplement (doi:10.1039/c2ce25328c), 2012-01-01
Supplement: c2ce25328c.pdf [file c2ce25328c.pdf]

# **Electronic Supplementary Information (ESI) for:**

**Synthesis, structures and luminescent properties of  
cadmium(II) metal organic frameworks based on  
3-pyrid-4-ylbenzoic acid, 4-pyrid-4-ylbenzoic acid ligands**

**Xiaojing Zhou, Baiyan Li, Guanghua Li,\* Qi Zhou, Zhan Shi\* and Shouhua Feng**

State Key Laboratory of Inorganic Synthesis and Preparative Chemistry, College of

Chemistry, Jilin University, Changchun, 130012, People's Republic of China

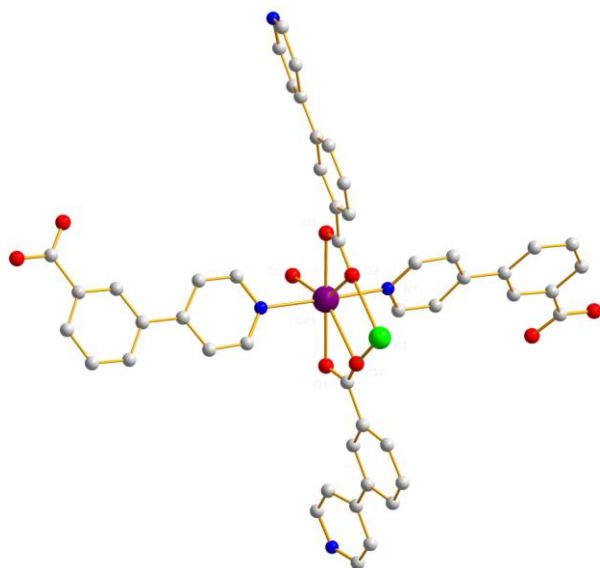

**Fig. S1** Coordination sphere of Cd atom in crystal **1** (Cd atoms: pink, K atoms :green, N atoms: blue, O atoms: red, H atoms are omitted for clarity).

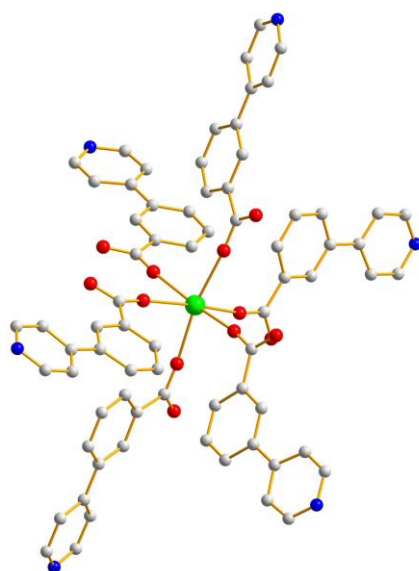

**Fig. S2** Coordination sphere of K atom in crystal **1** (K atoms: green, N atoms: blue, O atoms: red, H atoms are omitted for clarity).

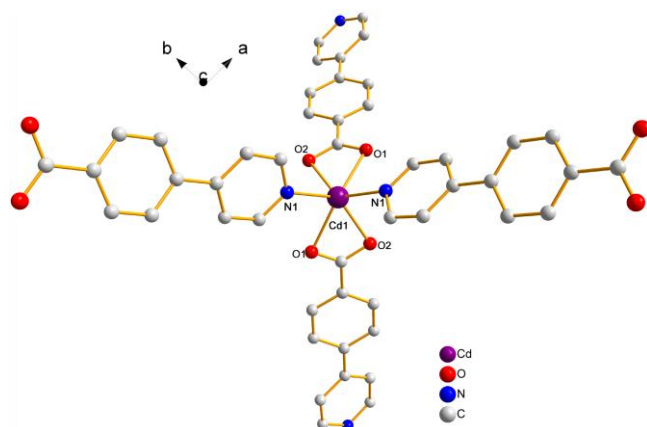

**Fig. S3** Coordination sphere of Cd atom in crystal **2** (Cd atoms: purple, Nitrogen: blue, Oxygen: red, Carbon: gray).

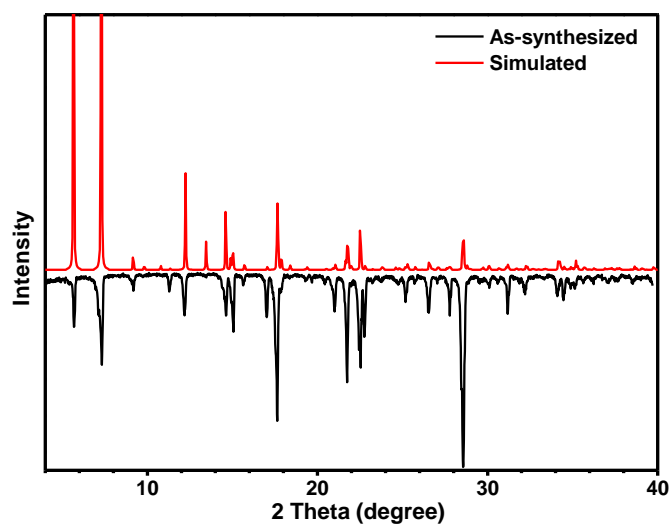

**Fig. S4** The PXRD of crystal **1**.

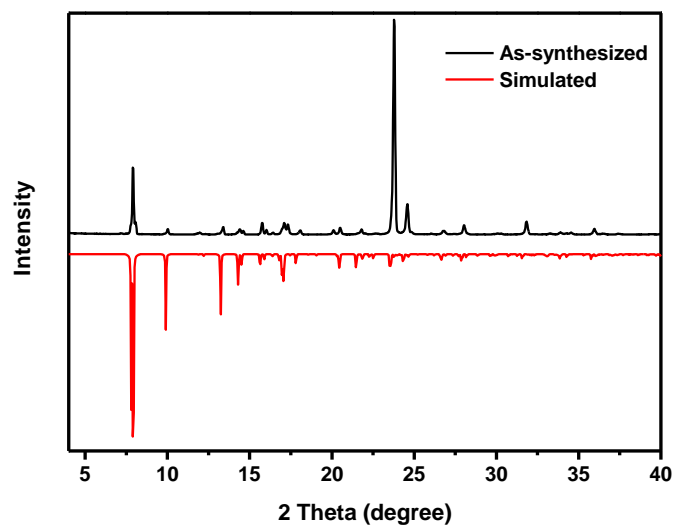

**Fig. S5** The PXRD of crystal 2.

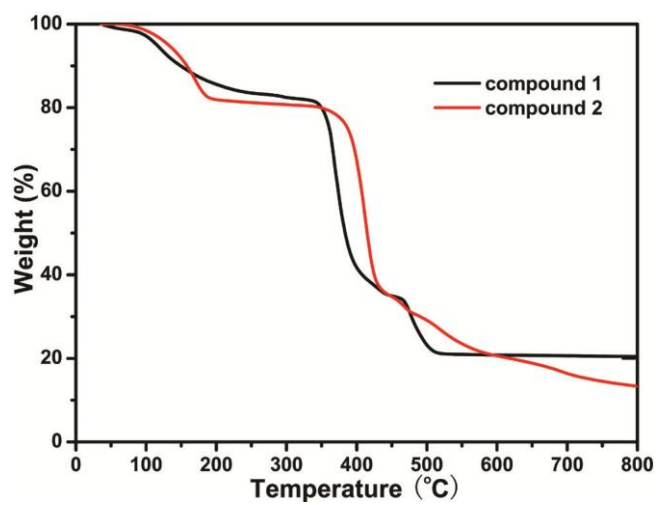

**Fig. S6** TGA profile of the compound 1, 2.

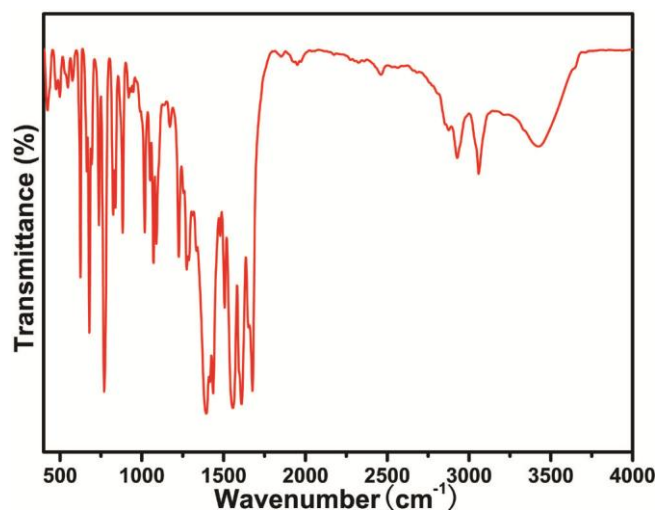

**Fig. S7** The IR spectrum of compound 1.

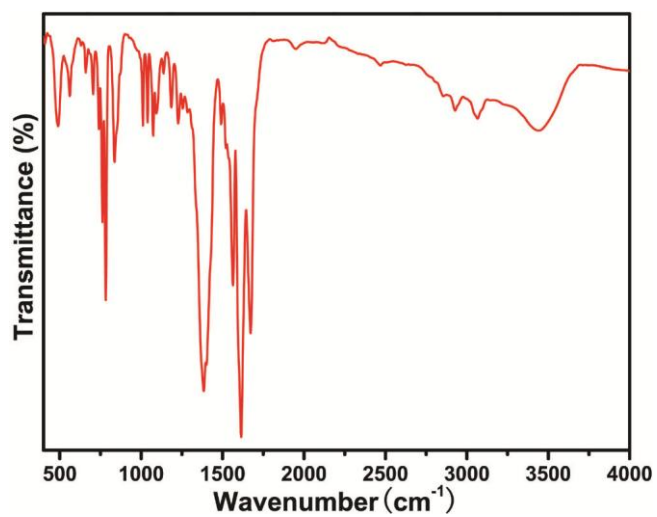

**Fig. S8** The IR spectrum of compound 2.
